# Supplementary material for: Design and synthesis of the superionic conductor Na10SnP2S12
Source: PubMed Central journal article supplement (PMC4800433; doi:10.1038/ncomms11009), 2016-03-17
Supplement: ncomms11009-s1.pdf [file ncomms11009-s1.pdf]

## Supplementary Figures

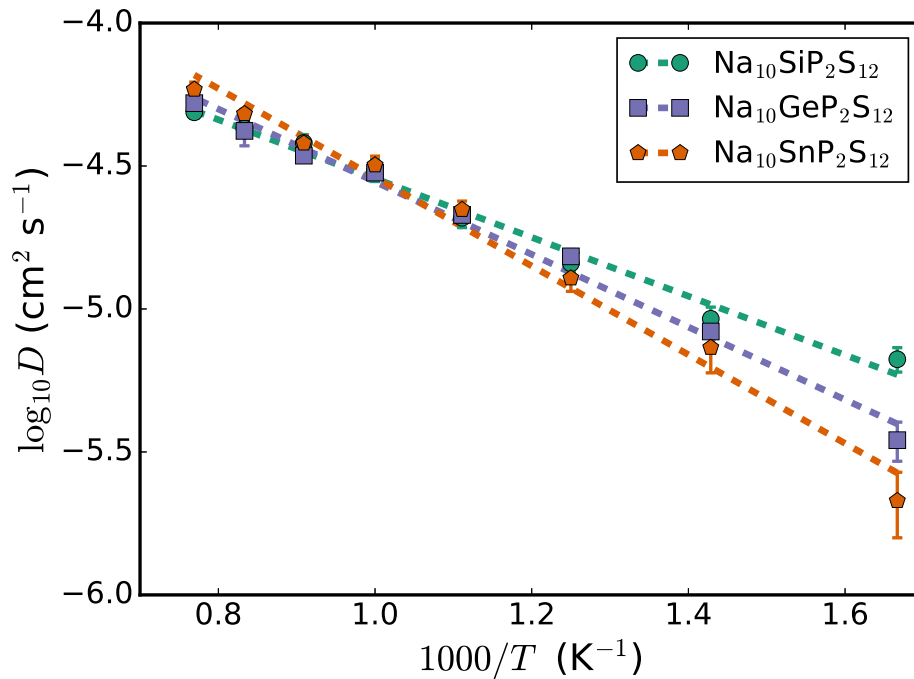

Supplementary Figure 1: Na self-diffusivity  $D_{\text{self}}$  in  $\text{Na}_{10}\text{SiP}_2\text{S}_{12}$ ,  $\text{Na}_{10}\text{GeP}_2\text{S}_{12}$ , and  $\text{Na}_{10}\text{SnP}_2\text{S}_{12}$  from AIMD simulation

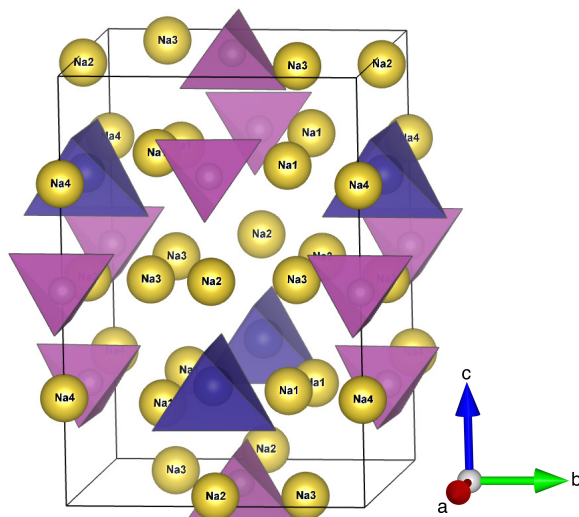

Supplementary Figure 2:  $C_{222}$  symmetry ground state ordering of Na atoms for the NMPS phases. Labels on the Na-atoms correspond to those of the  $P4_2/nmc$  space group disordered structure.

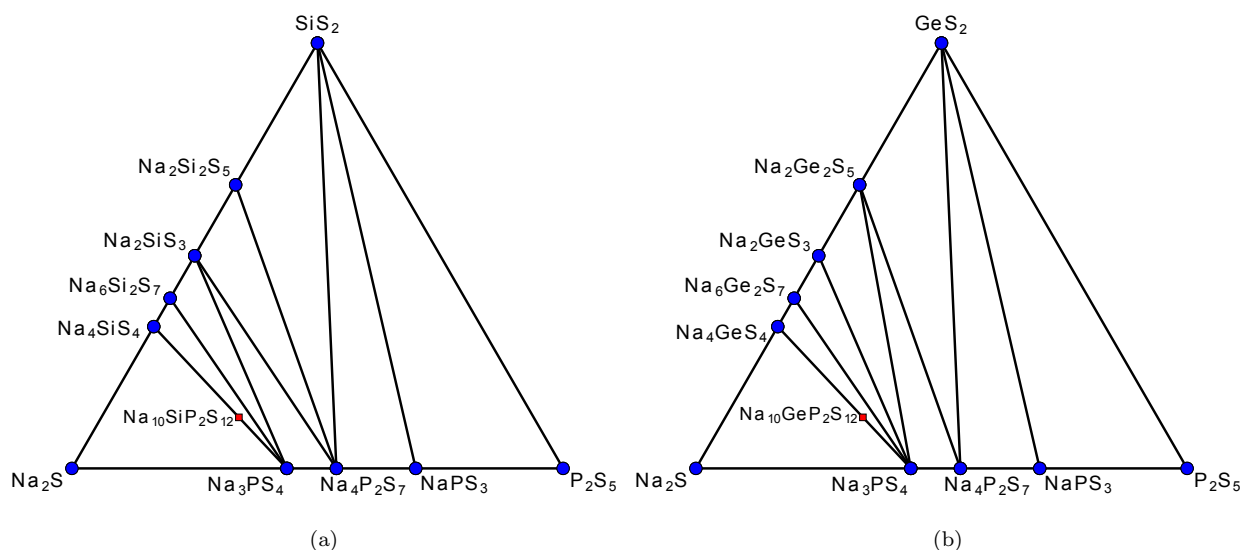

Supplementary Figure 3: Pseudo-ternary 0K phase diagrams for the a)  $\text{Na}_2\text{S-SiS}_2\text{-P}_2\text{S}_5$  and b)  $\text{Na}_2\text{S-GeS}_2\text{-P}_2\text{S}_5$  chemical systems, computed from DFT energy calculations.

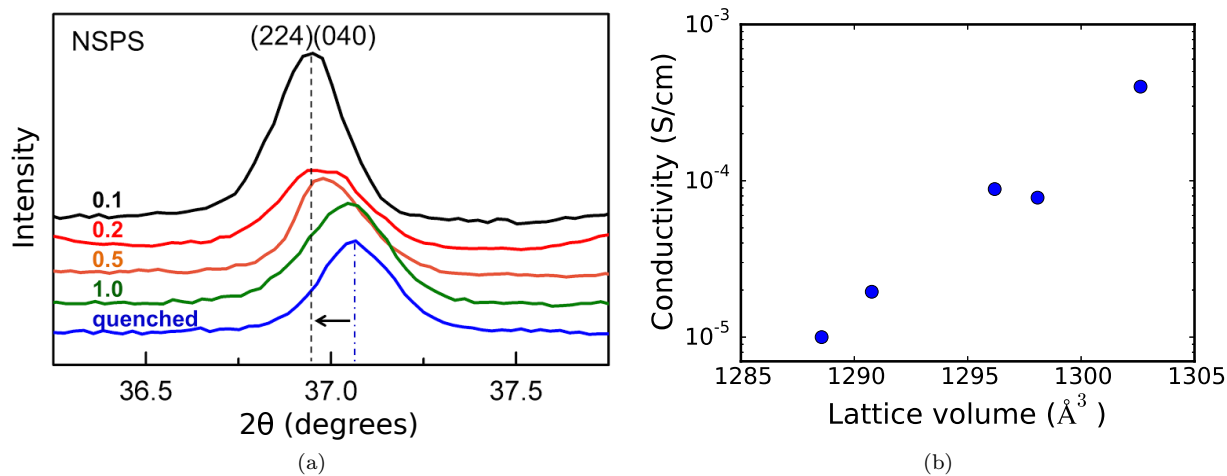

Supplementary Figure 4: a) Main peak position for cooling rates of 0.1, 0.2, 0.5, and 1.0  $\text{K min}^{-1}$ , and a quenched sample. Lattice volume increases as cooling rate is lowered b). Measured conductivity vs. lattice volume for these samples.

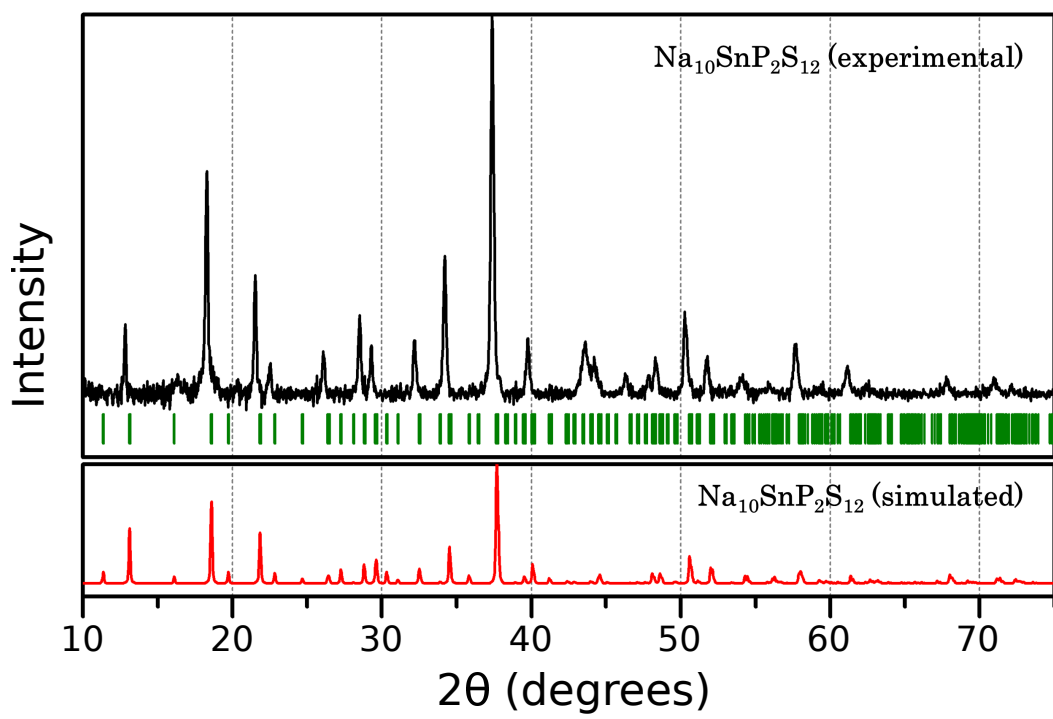

Supplementary Figure 5: Experimental and simulated XRD patterns of quenched  $\text{Na}_{10}\text{SnP}_2\text{S}_{12}$ .

## Supplementary Tables

| Compound                                  | $E_a$ (eV) | Self diffusivity $D_{\text{self}}$ at 298 K ( $\text{cm}^2 \text{s}^{-1}$ ) |
|-------------------------------------------|------------|-----------------------------------------------------------------------------|
| $\text{Na}_{10}\text{SiP}_2\text{S}_{12}$ | 0.204      | $1.13 \times 10^{-7}$                                                       |
| $\text{Na}_{10}\text{GeP}_2\text{S}_{12}$ | 0.252      | $2.97 \times 10^{-8}$                                                       |
| $\text{Na}_{10}\text{SnP}_2\text{S}_{12}$ | 0.307      | $6.94 \times 10^{-9}$                                                       |

Supplementary Table 1: Calculated self diffusivity  $D_{\text{self}}$  of  $\text{Na}_{10}\text{MP}_2\text{S}_{12}$  ( $M = \text{Si}, \text{Sn}, \text{Al}$ ). Note that the differences between these activation energies and the activation energies of  $D_{\text{corr}}$  listed in table 1 are not statistically significant.

| Cation (M) | a ( $\text{\AA}$ ) | c ( $\text{\AA}$ ) |
|------------|--------------------|--------------------|
| Si         | 9.60               | 13.53              |
| Ge         | 9.62               | 13.59              |
| Sn         | 9.68               | 13.63              |

Supplementary Table 2: DFT calculated lattice parameters for tetragonal  $\text{Na}_{10}\text{MP}_2\text{S}_{12}$  ( $M = \text{Si}, \text{Ge}, \text{Sn}$ ).
